# Supplementary material
Source: Royal Society of Chemistry journal article supplement (doi:10.1039/d6ta01008c)
Supplement: d6ta01008c1.pdf [file d6ta01008c1.pdf]

## Supporting Information

### A-Site High-Entropy Engineering Enables a Cobalt-Free Perovskite Air Electrode with Exceptional Activity and Durability for Reversible Solid Oxide Cells

Chenshuo Yuan<sup>a</sup>, Huanbin Zhang<sup>a</sup>, Hui Ye<sup>a</sup>, Pengkai Shan<sup>a</sup>, Bo Yin<sup>b</sup>, Sheng Cui<sup>a</sup>, Yifeng Zheng<sup>a,\*</sup>

<sup>a</sup>College of Materials Science and Engineering, Nanjing Tech University, No. 30 Puzhu Road(S), Nanjing, 211816, Jiangsu, China

<sup>b</sup>Morgan Thermal Ceramics (Shanghai) Co., Ltd. 18 Kang An Road, Kang Qiao Industrial Zone, Pudong, Shanghai, 201315, China

### Supporting figures

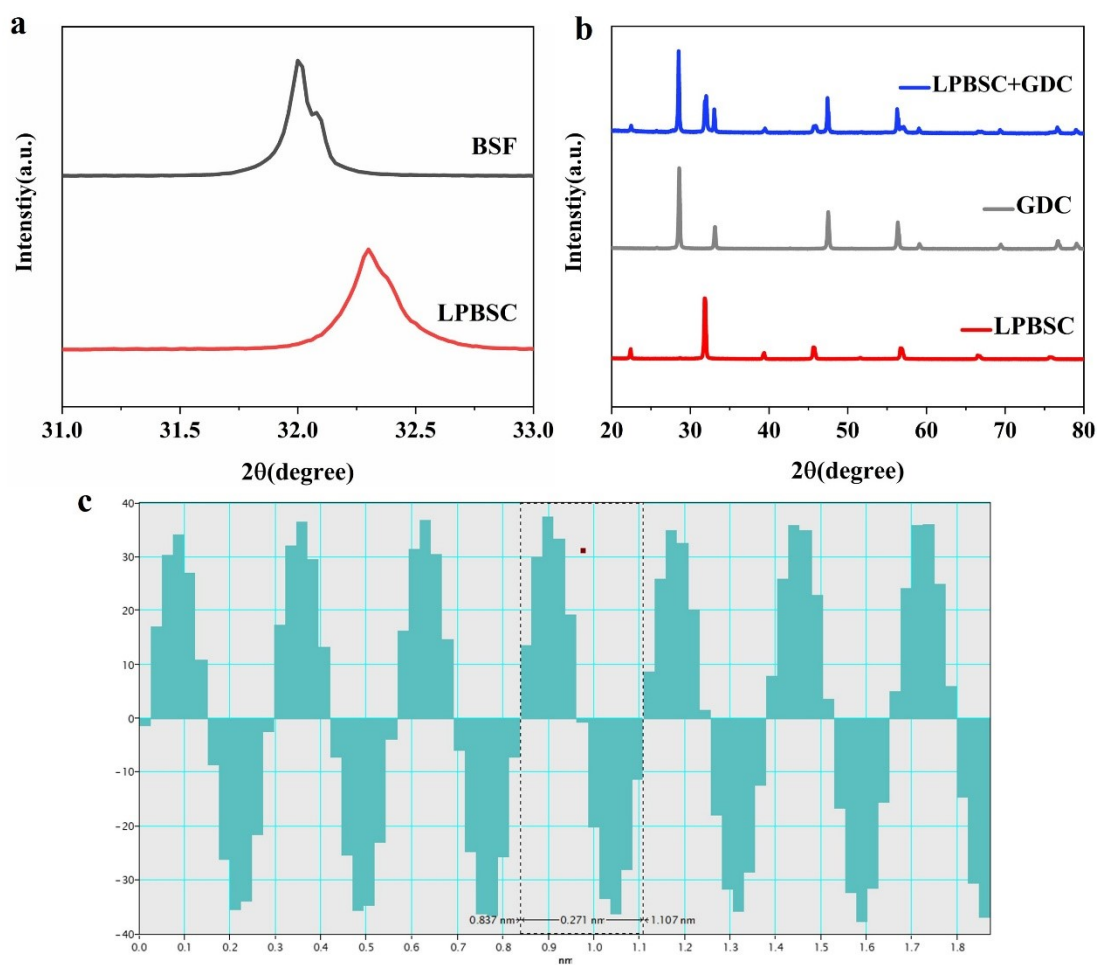

\* Corresponding author

E-mail addresses: [zhengyifeng@njtech.edu.cn](mailto:zhengyifeng@njtech.edu.cn) (Y. Zheng)

Fig. S1. (a) Magnified section of XRD patterns,  $2\theta = 31.5\text{--}32^\circ$ ; (b) XRD patterns of LPBSC/GDC sintered at  $1100^\circ\text{C}$  for 5 h; (c) The inverse fast fourier transform (IFFT) image of LPBSC.

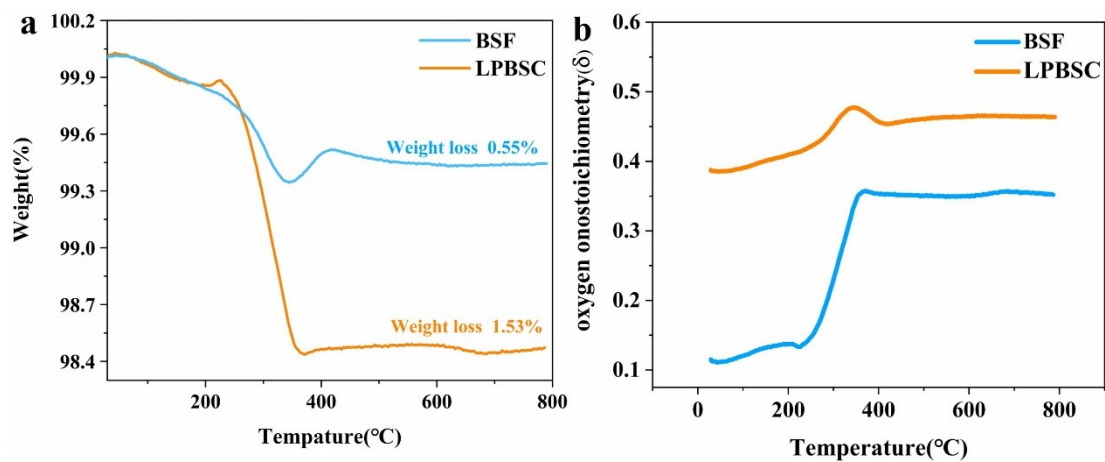

Fig. S2. (a) TGA curves of BSF and LPBSC; (b) Oxygen non-stoichiometry ( $\delta$ ) of BSF and LPBSC between  $30\text{--}800^\circ\text{C}$ .

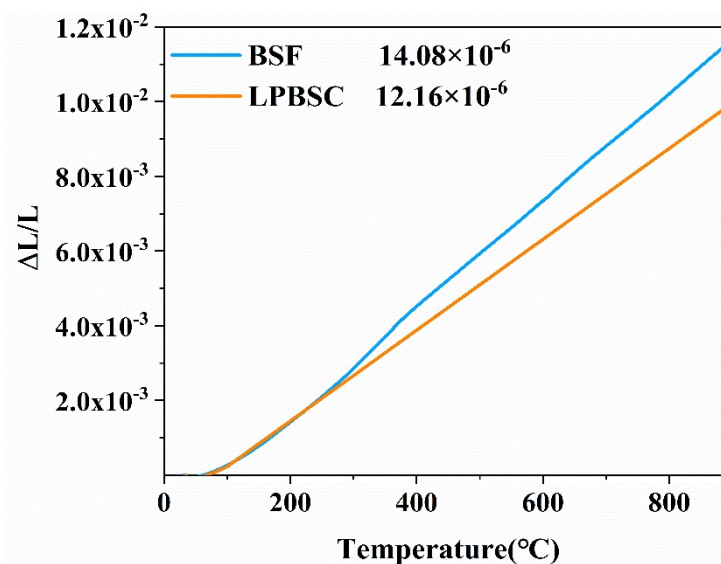

Fig. S3. Thermal expansion curves of BSF and LPBSC.

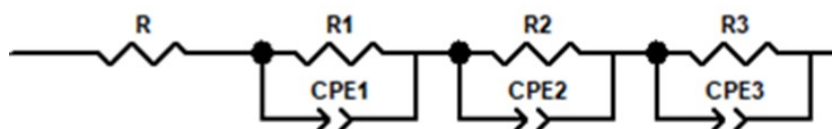

Fig. S4. Equivalent circuit of the BSF and LPBSC half-cell process.

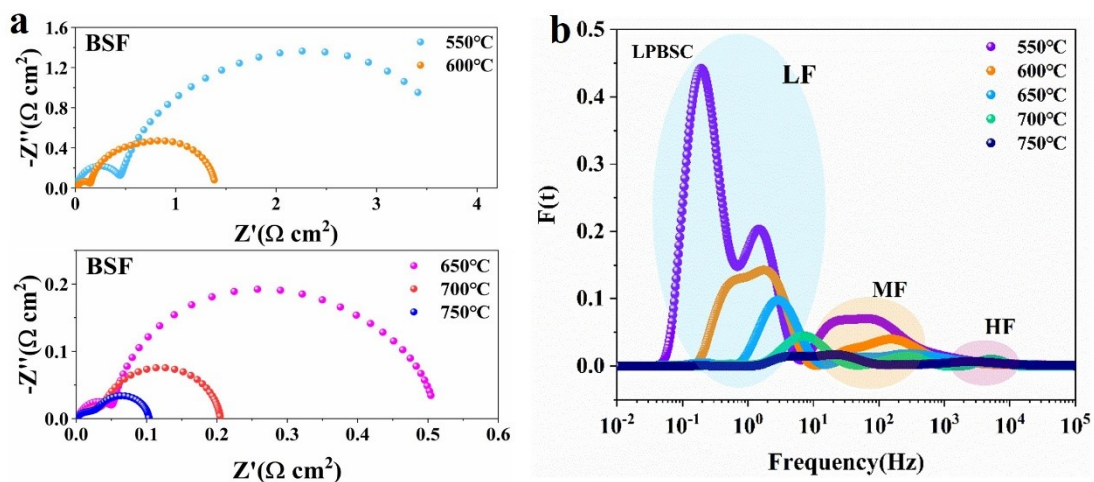

Fig. S5. (a) EIS curves of BSF air electrodes at 550-750 °C; (b) DRT analysis of LPBSC at different temperatures.

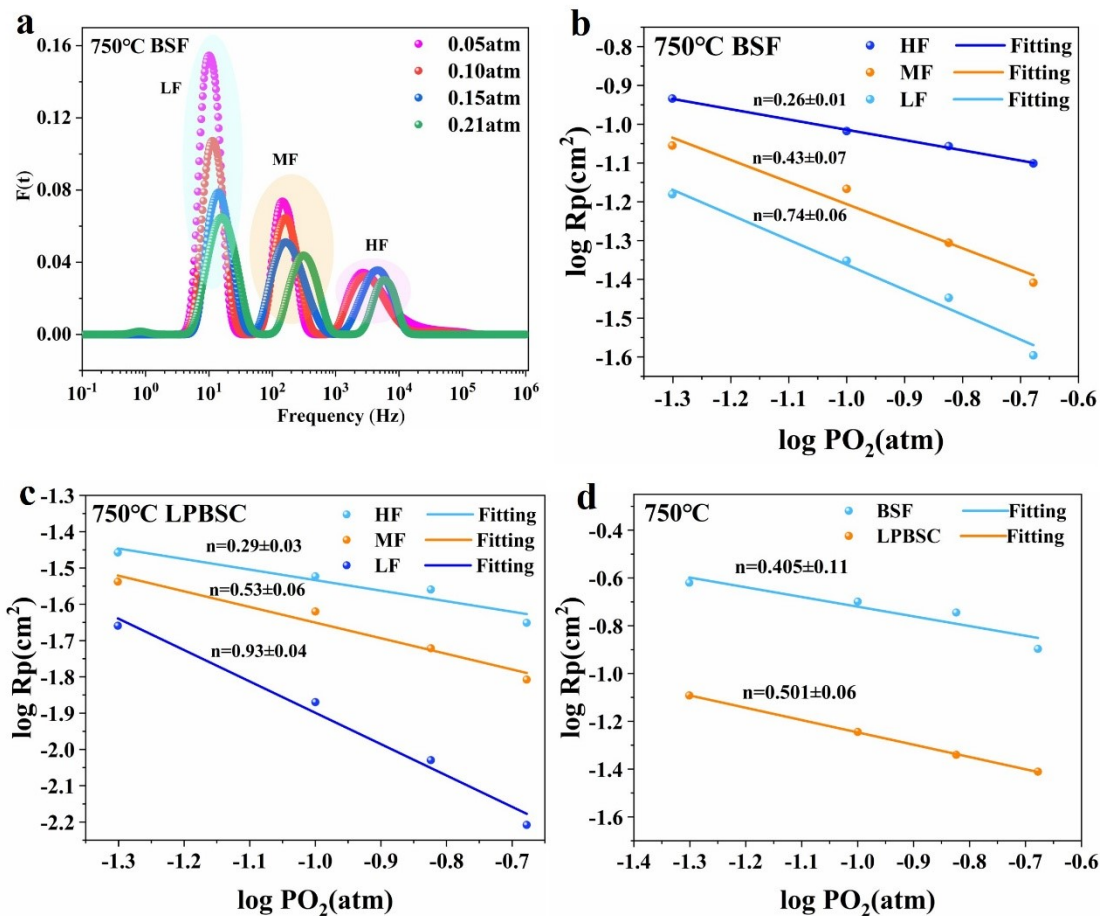

Fig. S6. (a) schematic illustration of the oxygen reduction reaction; The rate-limiting step of  $R_{\text{HF}}$ ,  $R_{\text{MF}}$ , and  $R_{\text{LF}}$  in (b) BSF; (c) LPBSC; (d)  $R_p$  value of BSF and LPBSC under different  $\text{PO}_2$  at 750 °C;

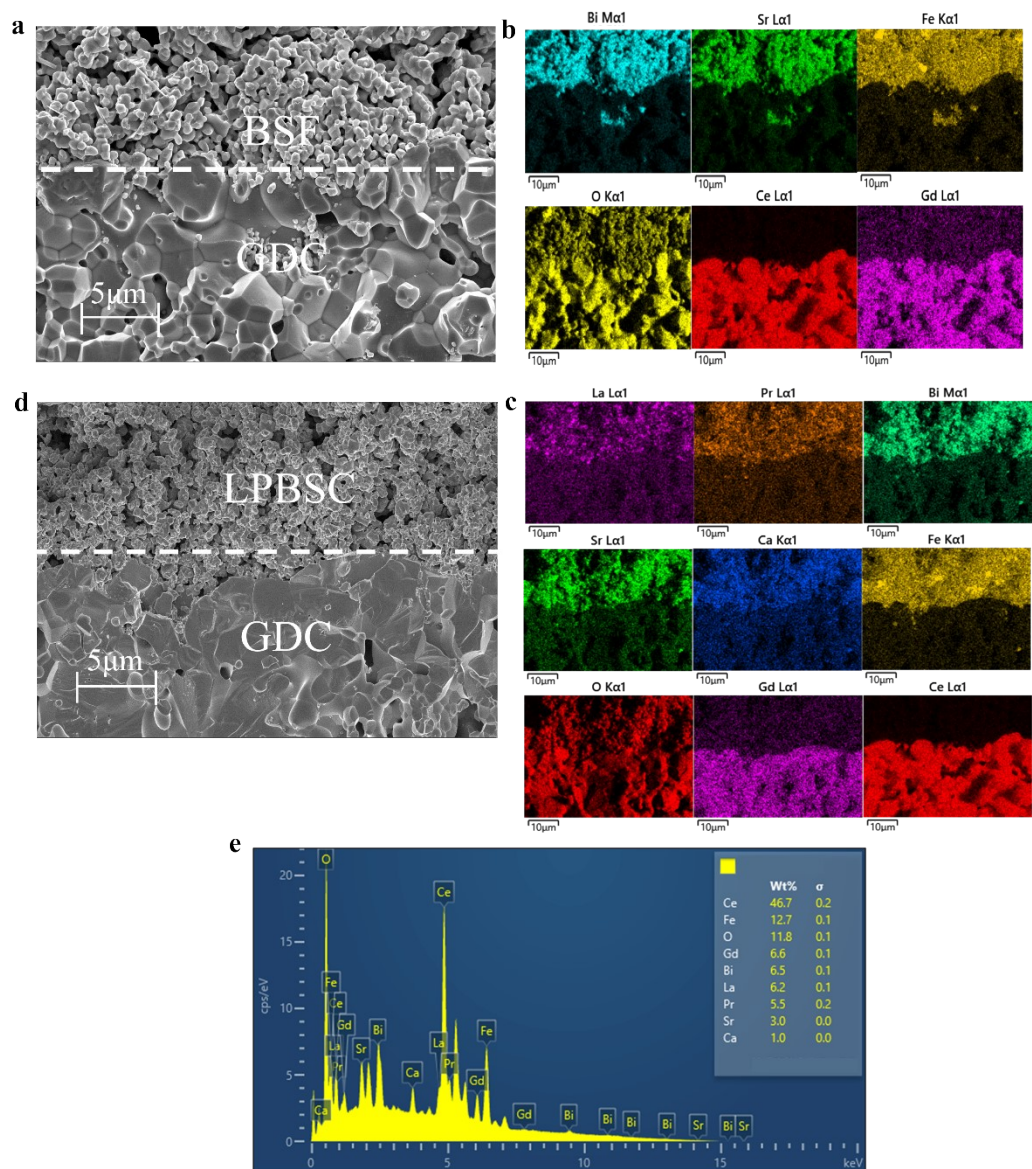

Fig. S7. (a) The cross-section SEM of the BSF half-cell After the stability test; (b) Cross-sectional EDX mapping of Fig. S7(a); (c) The cross-section SEM of the LPBSC half-cell After the stability test; (d) Cross-sectional EDX mapping of Fig. S7(c); (e) The simulated plots of the LPBSC half-cell atomic ratio.

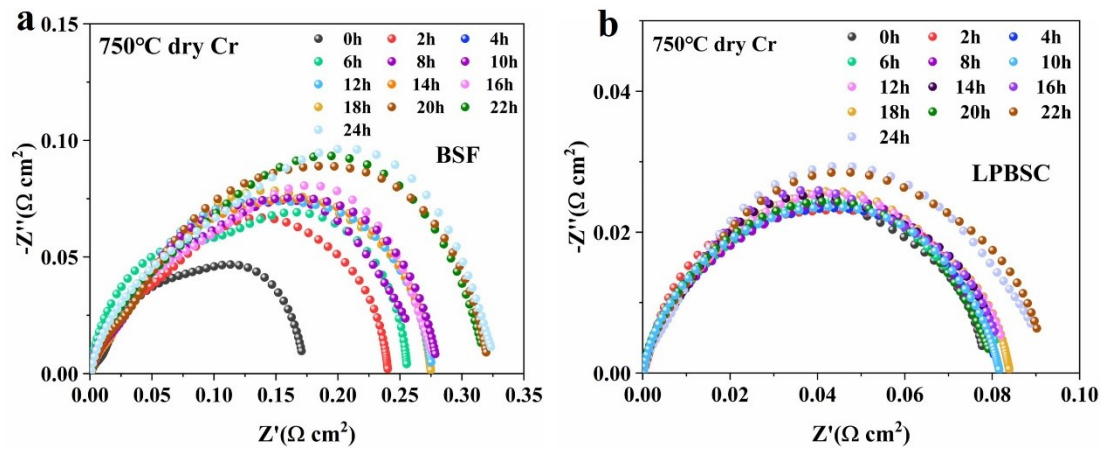

Fig. S8. EIS spectra of symmetric cells at 750 °C with Cr contamination in dry air for 24h (a) BSF; (b) LPBSC.

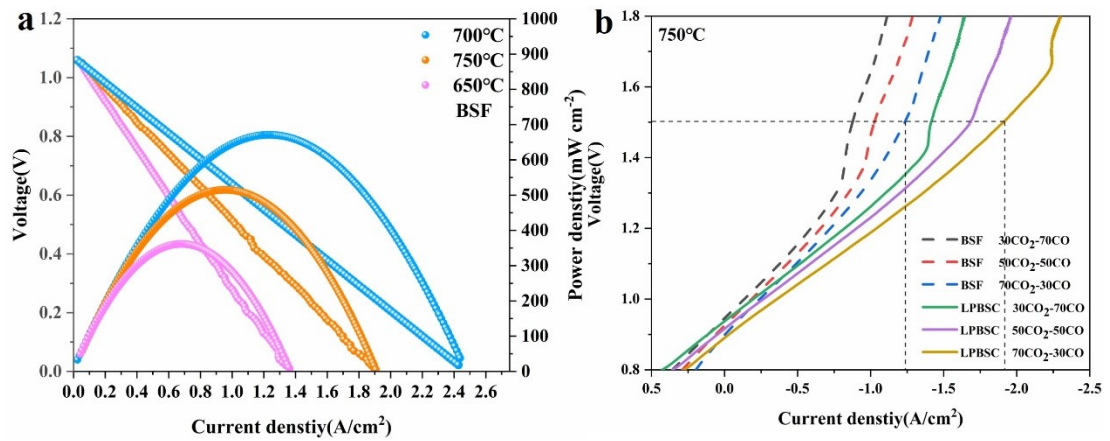

Fig. S9. (a) I-V-P curves of the single cell with BSF electrodes in dry  $\text{H}_2$  at different temperatures; (b) I-V curves of the single cell with BSF and LPBSC electrodes for  $\text{CO}_2$  electrolysis in different atmospheres.

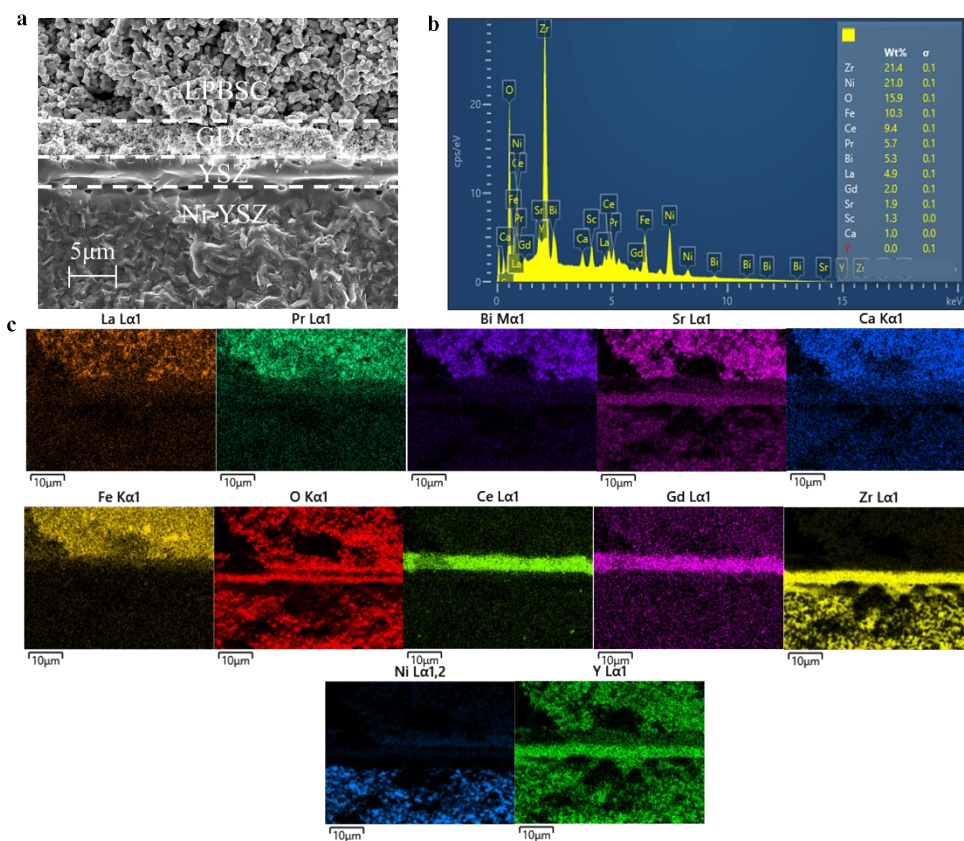

Fig. S10. (a)Cross-sectional SEM of LPBSC full-cell after stability test; (b) The simulated plots of the LPBSC full-cell atomic ratio ;(c) Cross-sectional EDX mapping of Fig. S9(a).

**Table S1**

The electrical conductivities of BSF and LPBSC at different temperatures

| Temperature(°C) | LPBSC (S cm <sup>-1</sup> ) | Temperature(°C) | BSF (S cm <sup>-1</sup> ) |
|-----------------|-----------------------------|-----------------|---------------------------|
| 300             | 9.022                       | 300             | 0.32081                   |
| 330             | 11.69118                    | 350             | 0.53709                   |
| 360             | 14.5676                     | 400             | 0.79384                   |
| 390             | 17.23577                    | 450             | 0.98171                   |
| 420             | 19.97874                    | 500             | 1.18518                   |
| 450             | 22.31668                    | 550             | 1.36316                   |
| 480             | 24.48454                    | 600             | 1.5017                    |
| 510             | 25.99249                    | 650             | 1.57532                   |
| 540             | 25.99249                    | 700             | 1.56075                   |
| 570             | 25.22595                    | 750             | 1.59644                   |
| 600             | 24.24394                    | 800             | 1.67159                   |
| 630             | 23.14081                    |                 |                           |
| 660             | 22.23435                    |                 |                           |
| 690             | 20.95935                    |                 |                           |
| 720             | 19.90525                    |                 |                           |
| 750             | 18.7651                     |                 |                           |
| 780             | 17.42837                    |                 |                           |
| 800             | 16.91914                    |                 |                           |

**Table S2**The  $R_{\text{total}}$ ,  $R_{\text{ohm}}$ , and ASR values of BSF and LPBSC air electrodes at 750°C.

| Samples | $R_{\text{total}}$ ( $\Omega \text{ cm}^2$ ) | $R_{\text{ohm}}$ ( $\Omega \text{ cm}^2$ ) | ASR ( $\Omega \text{ cm}^2$ ) |
|---------|----------------------------------------------|--------------------------------------------|-------------------------------|
| BSF     | 1.452                                        | 1.061                                      | 0.1955                        |
| LPBSC   | 1.088                                        | 0.967                                      | 0.0605                        |

**Table S3**Polarization Resistance ( $R_p$ ) of Different Perovskite Air Electrode Materials at 650–750 °C

| T/°C                      |                                                                                                      | 650°C | 700°C | 750°C |
|---------------------------|------------------------------------------------------------------------------------------------------|-------|-------|-------|
|                           | $\text{La}_{0.2}\text{Pr}_{0.2}\text{Sm}_{0.2}\text{Nd}_{0.2}\text{Sr}_{0.2}\text{FeO}_{3-\delta}$   | 0.35  | 0.25  | 0.15  |
|                           | $\text{La}_{0.6}\text{Sr}_{0.4}\text{Co}_{0.2}\text{Fe}_{0.8}\text{O}_{3-\delta}$                    | 1.026 | 0.331 | 0.112 |
| $R_p/\Omega \text{ cm}^2$ | $\text{Ba}_{0.2}\text{Sr}_{0.2}\text{La}_{0.2}\text{Pr}_{0.2}\text{Sm}_{0.2}\text{FeO}_{3-\delta}$   | 1.034 | 0.374 | 0.154 |
|                           | $\text{Ba}_{0.35}\text{Sr}_{0.35}\text{La}_{0.1}\text{Pr}_{0.1}\text{Sm}_{0.1}\text{FeO}_{3-\delta}$ | 0.506 | 0.199 | 0.090 |
|                           | $\text{Sr}_{0.2}\text{Ba}_{0.2}\text{Bi}_{0.2}\text{La}_{0.2}\text{Pr}_{0.2}\text{FeO}_{3-\delta}$   | 1.1   | 0.42  | 0.21  |
|                           | $\text{La}_{0.2}\text{Pr}_{0.2}\text{Ba}_{0.2}\text{Sr}_{0.2}\text{Ca}_{0.2}\text{FeO}_{3-\delta}$   | 0.28  | 0.13  | 0.063 |
|                           | BSF                                                                                                  | 0.5   | 0.2   | 0.1   |
|                           | LPBSC                                                                                                | 0.21  | 0.103 | 0.059 |
